# Supplementary material
Source: PubMed Central journal article supplement (PMC2845714)

Sup Figure 1

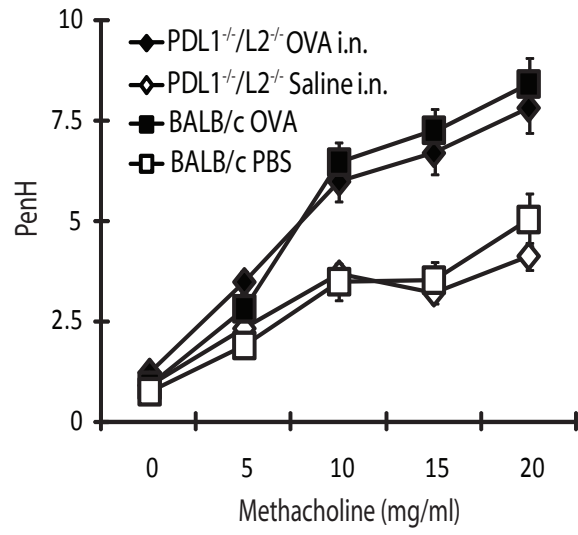

Supplement: NIHMS181861-supplement-Sup_Fig_1.pdf [file NIHMS181861-supplement-Sup_Fig_1.pdf]
